# Supplementary material for: A Colorimetric Sensor for the Highly Selective Detection of Sulfide and 1,4-Dithiothreitol Based on the In Situ Formation of Silver Nanoparticles Using Dopamine
Source: MDPI journal article supplement (doi:10.3390/s17030626), 2017-03-20
Supplement: s1 [file s1]

# Supplementary Materials: A Colorimetric Sensor for the Highly Selective Detection of Sulfide and 1,4-Dithiothreitol Based on the *In Situ* Formation of Silver Nanoparticles Using Dopamine

Lingzhi Zhao <sup>1,2,\*</sup>, Liu Zhao <sup>3</sup>, Yanqing Miao <sup>1</sup>, Chunye Liu <sup>1</sup> and Chenxiao Zhang <sup>2</sup>

<sup>1</sup> Department of pharmacy, Xi'an Medical College, Xi'an 710021, China; miaoyanqing2006@163.com (Y.M.); doris8976@163.com (C.L.)

<sup>2</sup> Laboratory of Analytical Chemistry for Life Science of Shaanxi Province, School of Chemistry and Chemical Engineering, Shaanxi Normal University, Xi'an 710062, China; cxzhang@snnu.edu.cn

<sup>3</sup> Beijing Research Center of Agricultural Standards and Testing, Beijing 100097, China; zhaoliu@nrcita.org.cn

\* Correspondence: oldskyhappy\_zlz@163.com; Tel.: +86-158-2958-3060

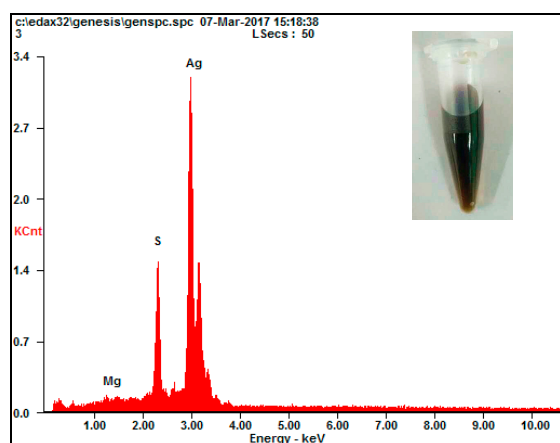

**Figure S1.** Energy dispersive X-ray spectroscopy (EDS) spectrum and photo of the mixture of 5 mM AgNO<sub>3</sub> and 5 mM Na<sub>2</sub>S.

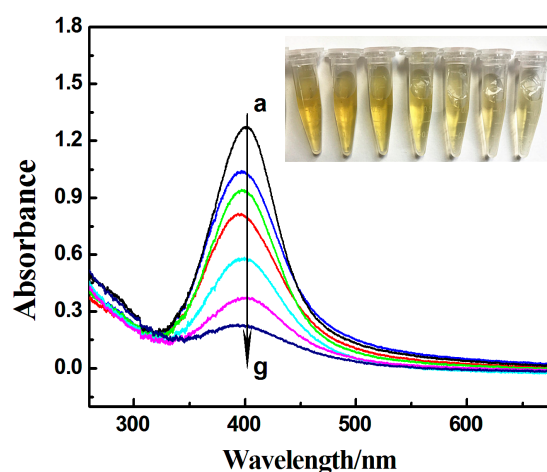

**Figure S2.** UV-Vis absorption responses of AgNPs in the absence (curve a) and presence of different concentrations of GSH (from curve a to g: 0, 10, 15, 20, 30, 50, 100 μM). The color changes of AgNPs before (the first tube) and after the reaction with different concentrations of GSH (from curve a to h: 0, 10, 15, 20, 30, 50, 100 μM) for 24 h later.

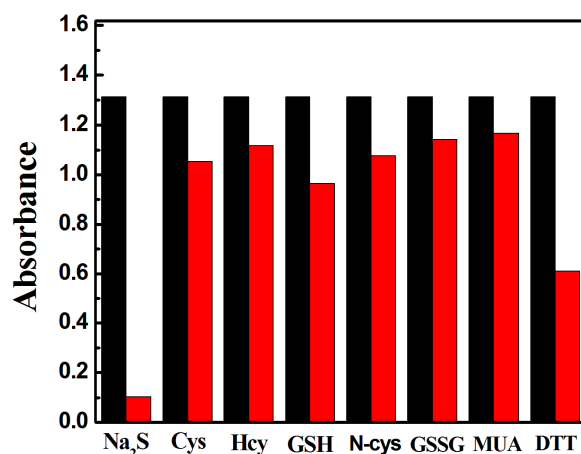

**Figure S3.** UV-Vis absorption responses of AgNPs in the absence (black columns) and presence of different thiol compounds (red columns). The reaction time for S<sup>2-</sup> and DTT, 20 min. The reaction time for Cys, Hcy, GSH, GSSG, MUA, N-cys, 2 h.

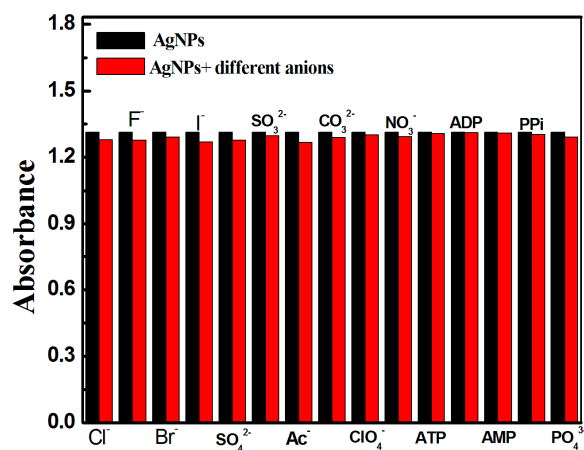

**Figure S4.** UV-Vis absorption responses of AgNPs in the absence (black columns) and presence of various anions (red columns) in aqueous solution. The concentration of Cl<sup>-</sup>, NO<sub>3</sub><sup>-</sup>, PO<sub>4</sub><sup>3-</sup>, SO<sub>4</sub><sup>2-</sup>, 100 μM; ATP, AMP, ADP, PPI, ClO<sub>4</sub><sup>-</sup>, CH<sub>3</sub>CO<sub>2</sub><sup>-</sup>, CO<sub>3</sub><sup>2-</sup>, SO<sub>3</sub><sup>2-</sup>, 50 μM; F<sup>-</sup>, Br<sup>-</sup>, I<sup>-</sup>, 20 μM.
